CORRECTION

# Correction: The Mitochondrial Genomes of the Nudibranch Mollusks, *Melibe leonina* and *Tritonia diomedea*, and Their Impact on Gastropod Phylogeny

The *PLOS ONE* Staff

The publisher apologizes for the following errors that were introduced during the typesetting process.

In the Materials and Methods, under the subheading “DNA isolation, sequencing, and assembly,” the species name is incorrectly spelled as “*Melibe leonine*.” The correct species name is “*Melibe leonina*.”

[Fig 2B](#) is missing from [Fig 2](#). Please view the complete, correct [Fig 2](#) here.

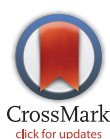

## OPEN ACCESS

**Citation:** The *PLOS ONE* Staff (2015) Correction: The Mitochondrial Genomes of the Nudibranch Mollusks, *Melibe leonina* and *Tritonia diomedea*, and Their Impact on Gastropod Phylogeny. *PLoS ONE* 10(7): e0132861. doi:10.1371/journal.pone.0132861

**Published:** July 13, 2015

**Copyright:** © 2015 The PLOS ONE Staff. This is an open access article distributed under the terms of the [Creative Commons Attribution License](#), which permits unrestricted use, distribution, and reproduction in any medium, provided the original author and source are credited.

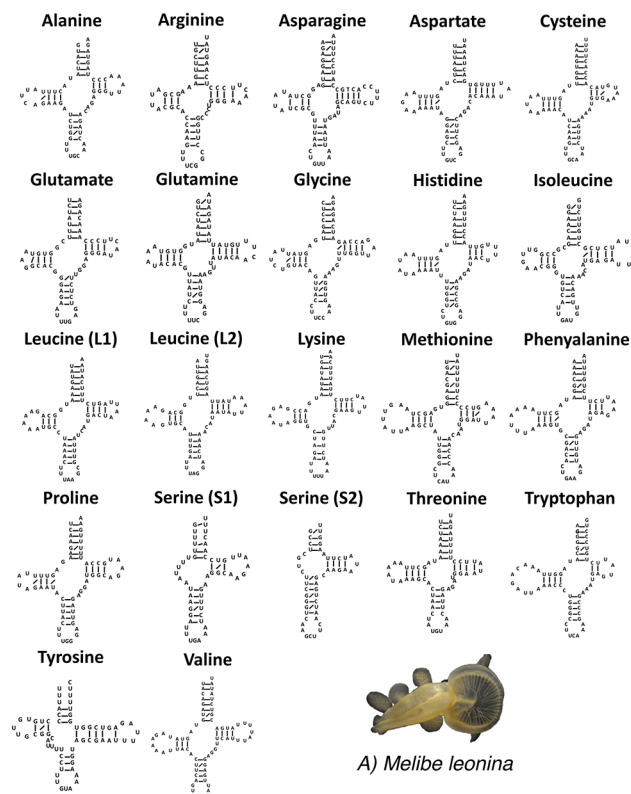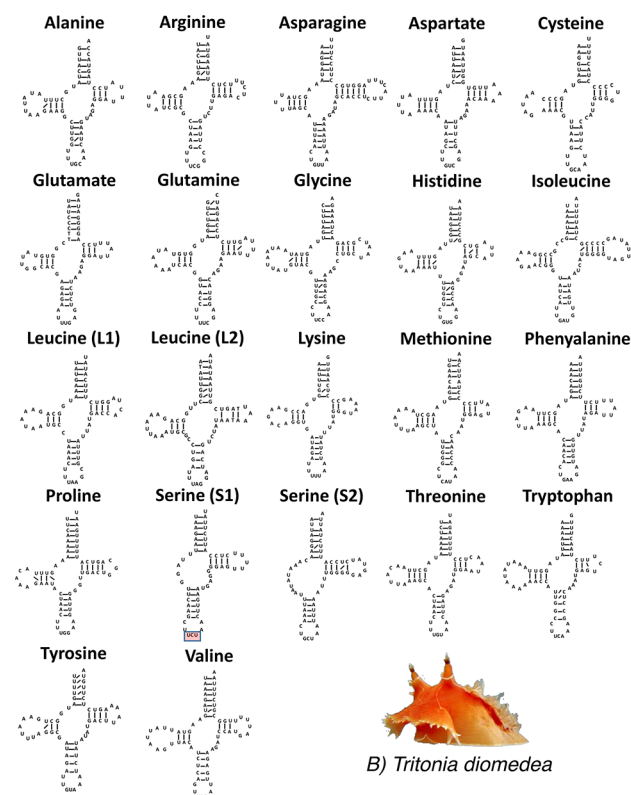

**Fig 2. Transfer RNA secondary structures for both *M. leonina* (A) and *T. diomedea* (B).** G-U pair bonds are indicated by a slanted line. The two serine tRNAs had a truncated d arm, seen in other heterobranchs. In *T. diomedea* (B), the UCU anticodon for the serine 1 tRNA (highlighted in red) has not been reported in any other gastropod.

doi:10.1371/journal.pone.0132861.g001

## Reference

1. Sevigny JL, Kirouac LE, Thomas WK, Ramsdell JS, Lawlor KE, Sharifi O, et al. (2015) The Mitochondrial Genomes of the Nudibranch Mollusks, *Melibe leonina* and *Tritonia diomedea*, and Their Impact on Gastropod Phylogeny. PLoS ONE 10(5): e0127519. doi: [10.1371/journal.pone.0127519](https://doi.org/10.1371/journal.pone.0127519) PMID: [25996944](https://pubmed.ncbi.nlm.nih.gov/25996944/)
